# Supplementary material for: Rational design of a phenothiazine-based donor–acceptor covalent organic framework for enhanced photocatalytic oxidative coupling of amines and cyclization of thioamides
Source: Royal Society of Chemistry journal article supplement (doi:10.1039/d2ta07177k), 2022-11-18
Supplement: d2ta07177k1.pdf [file d2ta07177k1.pdf]

Electronic Supplementary Information (ESI) for

**Rational design of a phenothiazine-based donor-acceptor covalent  
organic framework for enhanced photocatalytic oxidative coupling of  
amines and cyclization of thioamides**

Yang Liu,<sup>a</sup> Xinyue Jiang,<sup>a</sup> Likun Chen,<sup>b</sup> Yan Cui,<sup>b</sup> Qiu-Yan Li,<sup>\*a</sup> Xinsheng Zhao,<sup>a</sup> Xiguang Han,<sup>a</sup>  
Yong-Chao Zheng<sup>\*b</sup> and Xiao-Jun Wang<sup>\*a</sup>

<sup>a</sup>*Jiangsu Key Laboratory of Green Synthetic Chemistry for Functional Materials, School of  
Chemistry and Materials Science, School of Physics and Materials Science, Jiangsu Normal  
University, Xuzhou 221116, P. R. China. E-mail: xjwang@jsnu.edu.cn; qyli@jsnu.edu.cn*

<sup>b</sup>*State Key Laboratory of NBC Protection for Civilian, Beijing, 102205, PR China. E-mail:  
zhengycfh@163.com*

## General method and materials

Unless specifically mentioned, all chemicals are commercially available and were used as received.  $^1\text{H}$  and  $^{13}\text{C}$  NMR spectra were taken on a Bruker AV400 at room temperature. High-resolution mass spectrometry (HR-MS) was performed on a Thermo ultimate Q-Exactive in positive mode.  $^{13}\text{C}$  cross-polarization/magic angle spinning solid-state nuclear magnetic resonance (CP/MAS ssNMR) experiments were performed on a Bruker AVANCE III 400 WB spectrometer operating at 100.62 MHz for  $^{13}\text{C}$  using a double resonance 4 mm MAS NMR probe and a sample spinning rate of 6 kHz. The powder X-ray diffraction measurements were taken on a Bruker D8 diffractometer using  $\text{Cu-K}_\alpha$  radiation ( $\lambda = 1.5418 \text{ \AA}$ ) at room temperature. Low-pressure gas sorption measurements were performed by using Quantachrome Instruments Autosorb-iQ with the extra-high pure gases. Brunauer-Emmett-Teller (BET) surface area and pore size distribution were calculated from the  $\text{N}_2$  sorption isotherms at 77 K based on the solid density functional theory (QSDFT) model in the Quantachrome ASiQwin 2.01 software package. UV-vis diffuse reflectance spectra (UV-vis DRS) were recorded at room temperature on an Agilent Cary 7000 Spectrophotometer. Photoluminescence (PL) spectra were obtained with an Edinburgh FLS920 spectrophotometer. The infrared spectra were recorded on a Thermo Scientific Nicolet iS10 FT-IR spectrometer as KBr pellets. Temperature-dependent photoluminescence spectra were recorded on a HORIBA FluoroMax Plus module fluorescence spectrometer. ESR spectra were recorded at room temperature using a Bruker A300 spectrometer at 9.8 GHz, X-band, with 100 Hz field modulation. Ultraviolet photoelectron spectroscopy (UPS) and X-ray photoelectron spectroscopy (XPS) were performed on Thermo Scientific Escalab 250Xi and K-Alpha. Field-emission scanning electron microscopy (FE-SEM) images were obtained on a HITACHI S-8010 instrument operating at 10 kV. Transmission electron microscopy (TEM) images were obtained on a JEM 2100F operating at 200 kV.

## Synthesis and Characterizations

### 10-phenyl-10H-phenothiazine (PTZ):

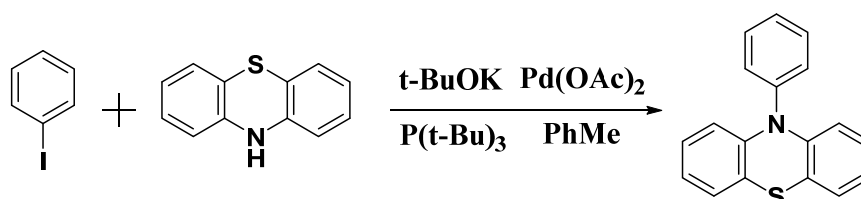

Toluene (100 mL) was added to a 250 mL two-necked flask and nitrogen was used to degas it for two hours. After the previous step was completed 10H-phenothiazine (4.98 g, 25.0 mmol), iodobenzene (6.12 g, 30.0 mmol), potassium *t*-butoxide (4.20 g, 37.5 mmol),  $\text{Pd}(\text{OAc})_2$  (280 mg, 1.3 mmol), and *tert*-butyl phosphate ( $\text{P}(\text{t-Bu})_3$ ) (1.26 g, 6.3 mmol) was added to the reaction flask, and evacuated and filled with nitrogen three times. The mixture was stirred and then heated at 110 °C for 24 h. After that, the mixture was poured into ice water and then was extracted with DCM; the combined organic layers were dried over anhydrous  $\text{Na}_2\text{SO}_4$  and filtered. The solvent was removed under rotary evaporation. The product was purified by column chromatography over a silica gel column using petroleum ether-ethyl acetate (v/v, 60/1) to give a white solid (5.53 g, 20.1 mmol, yield: 80%).  $^1\text{H}$  NMR (400 MHz,  $d_6$ -DMSO)  $\delta$  7.67 (t,  $J = 7.6$  Hz, 2H), 7.54 (t,  $J = 7.3$  Hz, 1H), 7.42 (d,  $J = 7.9$  Hz, 2H), 7.08 (d,  $J = 7.4$  Hz, 2H), 6.89 (dt,  $J = 29.0, 7.3$  Hz, 4H), 6.16 (d,  $J = 8.1$  Hz, 2H).

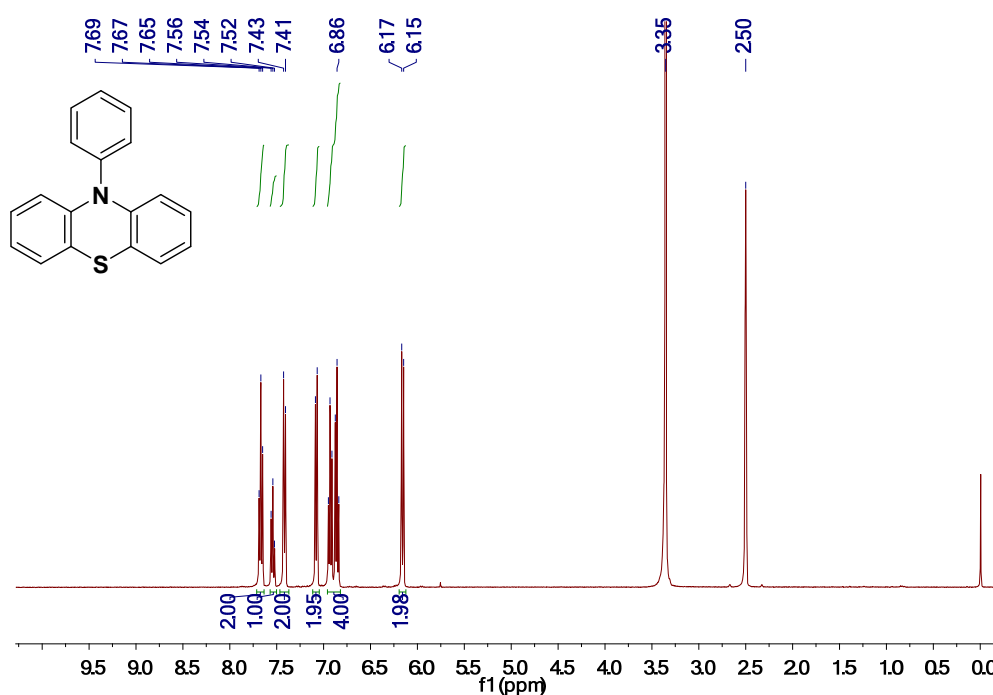

Fig. S1.  $^1\text{H}$  NMR of compound PTZ (400 MHz,  $d_6$ -DMSO).

### 3,7-dibromo-10-(4-bromophenyl)-10H-phenothiazine (PTZ-3Br):

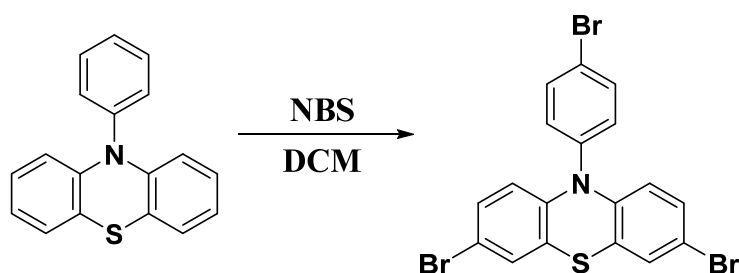

To a mixture of 10-phenyl-10H-phenothiazine (3.99 g, 14.5 mmol) in DCM (80 mL), N-bromosuccinimide (8.53 g, 47.9 mmol) was added into the above mixture in batches. The mixture was stirred at room temperature for 12 h. After that, the mixture was poured into ice water and extracted with DCM and the combined organic extracts were dried over anhydrous  $\text{Na}_2\text{SO}_4$  and concentrated. The crude product was purified by column chromatography over a silica gel column using petroleum ether and dichloromethane (v/v, 10/1) to give a white solid (6.38 g, 12.5 mmol, yield: 86%).  $^1\text{H}$  NMR (400 MHz,  $d_6$ -DMSO)  $\delta$  7.86 (d,  $J = 8.2$  Hz, 2H), 7.40 (d,  $J = 8.3$  Hz, 2H), 7.31 (s, 2H), 7.15 – 7.04 (m, 2H), 6.05 (d,  $J = 8.8$  Hz, 2H).

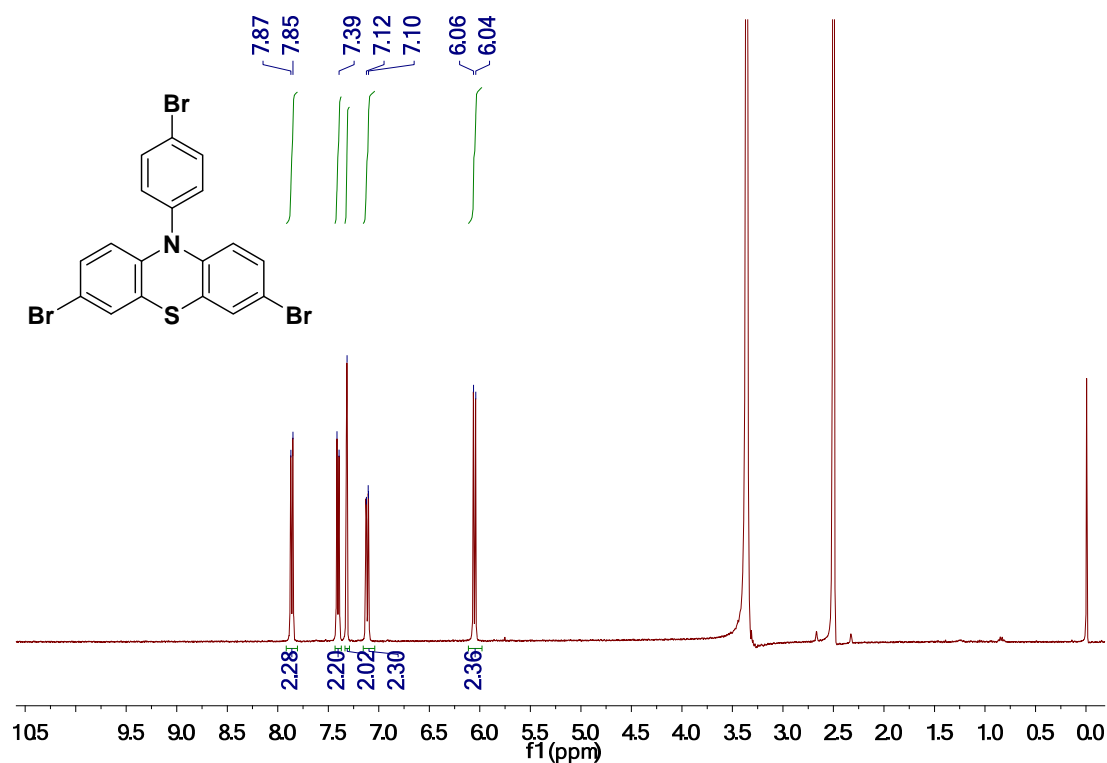

Fig. S2  $^1\text{H}$  NMR of compound PTZ-3Br (400 MHz,  $d_6$ -DMSO).

### 10-(4-formylphenyl)-10H-phenothiazine-3,7-dicarbaldehyde (PTZ-CHO):

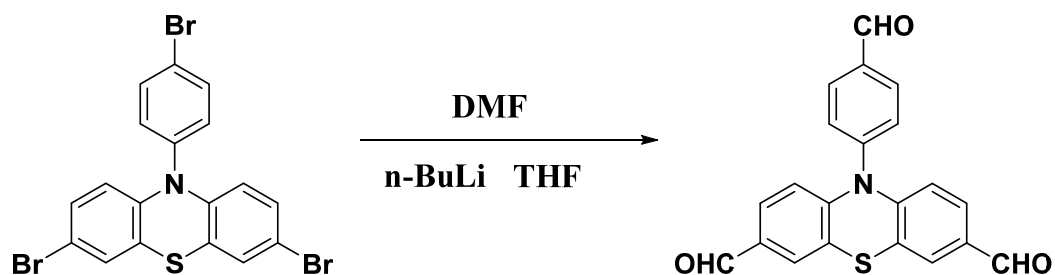

In a 250 mL two-neck flask, the suspension of 3,7-dibromo-10-(4-bromophenyl)-10H-phenothiazine (3.53 g, 6.9 mmol) in dry THF (100 ml) was cooled down to -78 °C under N<sub>2</sub> condition and then the solution of *n*-BuLi (28 mL, 69.9 mmol, 2.5 M in hexane) was added. The mixture was stirred at -78 °C for 1 h and then dry DMF (4.47 g, 62.1 mmol) was added. The reaction was at the same temperature for one hour, and restoration of room temperature. The reaction system was extracted with ethyl acetate and an appropriate amount of hydrochloric acid was added. Wash the organic phase with saturated salt water to pH = 7. The combined organic extracts were dried over anhydrous Na<sub>2</sub>SO<sub>4</sub> and concentrated to obtain an orange solid. The crude product was purified by column chromatography over a silica gel column using dichloromethane and ethyl acetate (v/v, 20/1) to give an orange solid (1.73 g, 4.8 mmol, yield: 70%). <sup>1</sup>H NMR (400 MHz, *d*<sub>6</sub>-DMSO) δ 10.17 (s, 1H), 9.75 (s, 2H), 8.26 (d, *J* = 8.0 Hz, 2H), 7.79 (d, *J* = 8.0 Hz, 2H), 7.60 (s, 2H), 7.46 (d, *J* = 8.6 Hz, 2H), 6.22 (d, *J* = 8.5 Hz, 2H). <sup>13</sup>C NMR (CDCl<sub>3</sub>, 101 MHz) δ 190.80, 189.72, 146.99, 144.81, 136.91, 132.83, 132.49, 131.42, 130.04, 127.88, 120.66, 116.20, EI-HRMS: *m/z* calcd for C<sub>21</sub>H<sub>13</sub>NO<sub>3</sub>S: 359.0616, found: 359.0608 [M]<sup>+</sup>.

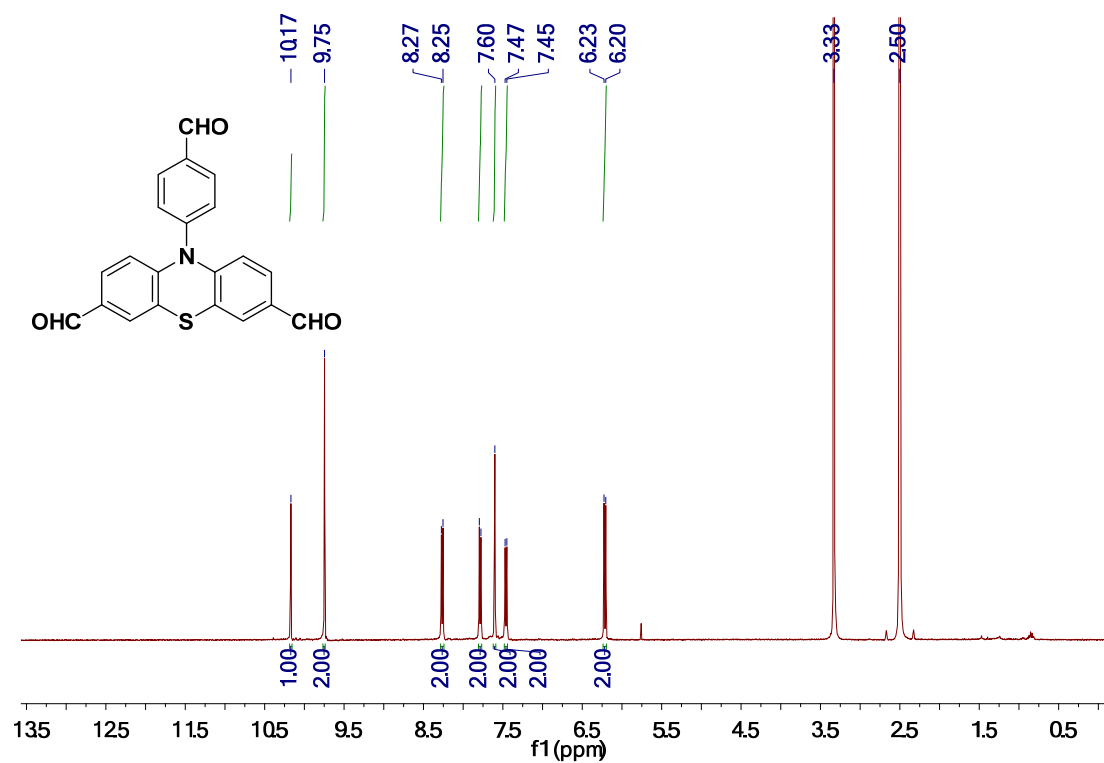

Fig. S3  $^1\text{H NMR}$  of compound PTZ-CHO (400 MHz,  $d_6$ -DMSO).

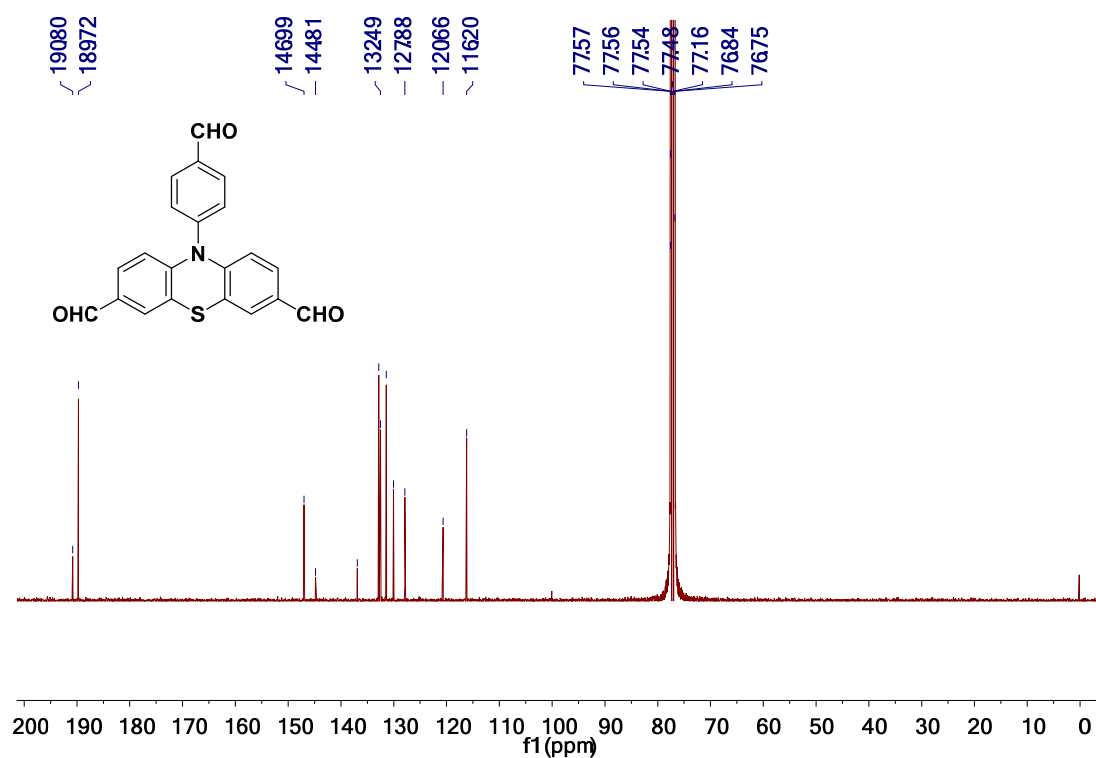

Fig. S4.  $^{13}\text{C NMR}$  of compound PTZ-CHO (101 MHz,  $\text{CDCl}_3$ ).

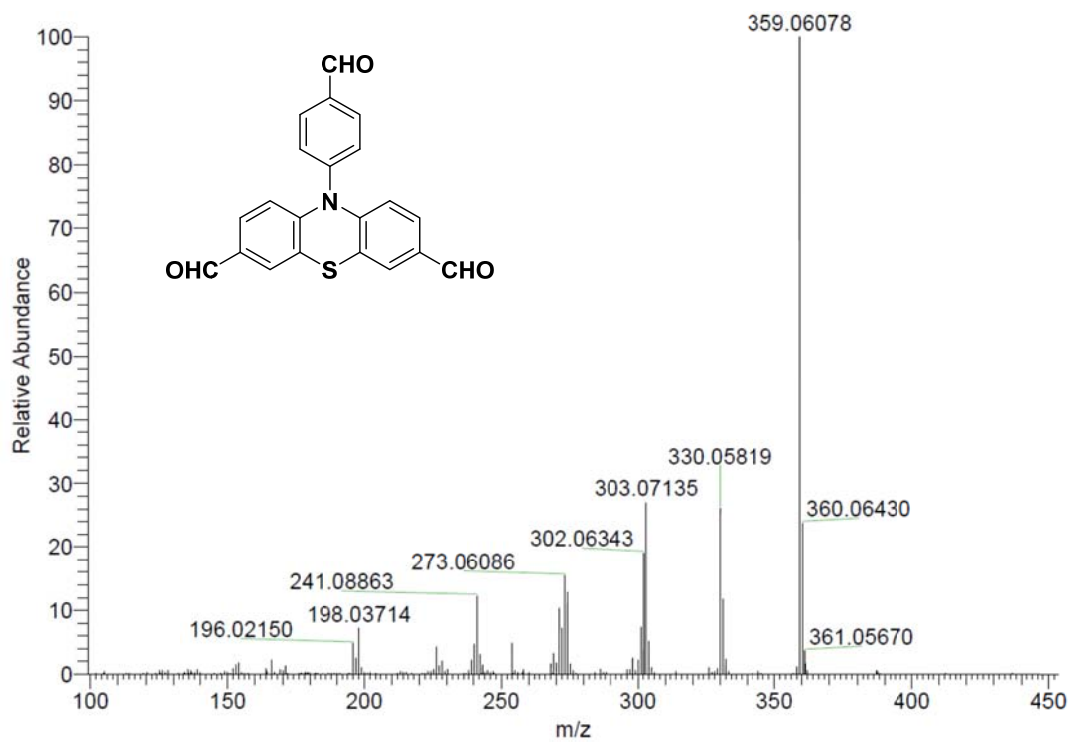

**Fig. S5.** EI-HRMS spectrum of compound **PTZ-CHO**.

## Synthesis of PTZ-TTA-COF

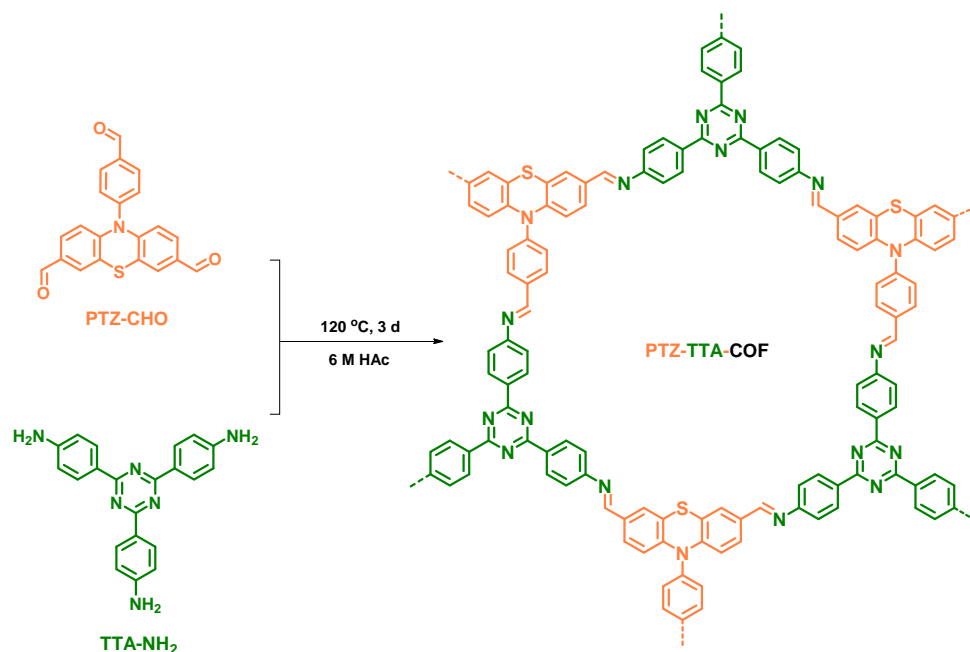

A mixture of TTA-NH<sub>2</sub> (21 mg, 0.06 mmol), PTZ-CHO (21 mg, 0.056 mmol), acetic acid (6 M, 0.1 mL) in *o*-dichlorobenzene (*o*-DCB)/diphenyl ether (DPE) (0.3 mL/0.7 mL) in a Pyrex tube (5 mL) was first sonicated for 30 minutes and then flash frozen at 77 K (liquid N<sub>2</sub> bath) and degassed by three times of freeze-pump-thaw cycle. The tube was sealed off under a flame and then heated at 120 °C for 72 h. After cooling to room temperature, the red precipitate was washed several times until the upper layer is colorless with THF, MeOH, and acetone, respectively. The resulting powder was subjected to Soxhlet extraction with THF for 12 h, and then dried under vacuum at 60 °C overnight to obtain a bright red solid (80%).



**Table S1.** Optimization of synthetic conditions for **PTZ-TTA-COF**.

| Entry | Solvents                                | T (°C) | Crystallinity | Yield    |
|-------|-----------------------------------------|--------|---------------|----------|
| 1     | Mesitylene/Dioxane/6M HAc = 0.3/0.7/0.1 | 120    | low           | low      |
| 2     | Mesitylene/Dioxane/6M HAc = 0.5/0.5/0.1 | 120    | low           | low      |
| 3     | Mesitylene/Dioxane/6M HAc = 0.7/0.3/0.1 | 120    | No            | low      |
| 4     | Mesitylene/Butanol/6M HAc = 0.3/0.7/0.1 | 120    | No            | No       |
| 5     | Mesitylene/Butanol/6M HAc = 0.5/0.5/0.1 | 120    | No            | No       |
| 6     | Mesitylene/Butanol/6M HAc = 0.7/0.3/0.1 | 120    | No            | No       |
| 7     | Mesitylene/Butanol/6M HAc = 0.7/0.3/0.1 | 80     | Moderate      | low      |
| 8     | Mesitylene/Butanol/HAc = 0.3/0.7/0.1    | 80     | low           | low      |
| 9     | Mesitylene/Butanol/HAc = 0.7/0.3/0.1    | 80     | High          | low      |
| 10    | Mesitylene/DPE/6M HAc = 0.7/0.3/0.1     | 120    | High          | High     |
| 11    | Mesitylene/DPE/6M HAc = 0.3/0.7/0.1     | 120    | High          | High     |
| 12    | Mesitylene/DPE/6M HAc = 0.7/0.3/0.1     | 150    | High          | High     |
| 13    | Mesitylene/DPE/6M HAc = 0.3/0.7/0.1     | 150    | High          | High     |
| 14    | Mesitylene/DPE/12M HAc = 0.7/0.3/0.1    | 120    | High          | High     |
| 15    | Mesitylene/DPE/12M HAc = 0.5/0.5/0.1    | 120    | High          | High     |
| 16    | Mesitylene/DPE/12M HAc = 0.3/0.7/0.1    | 120    | High          | High     |
| 17    | <i>o</i> -DCB/DPE/6M HAc = 0.7/0.3/0.1  | 120    | High          | High     |
| 18    | <i>o</i> -DCB/DPE/6M HAc = 0.5/0.5/0.1  | 120    | High          | High     |
| 19    | <i>o</i> -DCB/DPE/6M HAc = 0.3/0.7/0.1  | 120    | Highest       | High     |
| 20    | <i>o</i> -DCB/DPE/12M HAc = 0.7/0.3/0.1 | 150    | Highest       | High     |
| 21    | Butanol/DPE/12M HAc = 0.7/0.3/0.1       | 120    | Highest       | High     |
| 22    | CH <sub>3</sub> CN/HAc = 1/0.05         | RT     | No            | Moderate |
| 23    | CH <sub>3</sub> CN/12M HAc = 1/0.1      | RT     | No            | Moderate |
| 24    | Mesitylene/DPE/6M HAc = 0.5/0.5/0.1     | RT     | Moderate      | Moderate |
| 25    | Mesitylene/DPE/12M HAc = 0.5/0.5/0.05   | RT     | High          | Moderate |

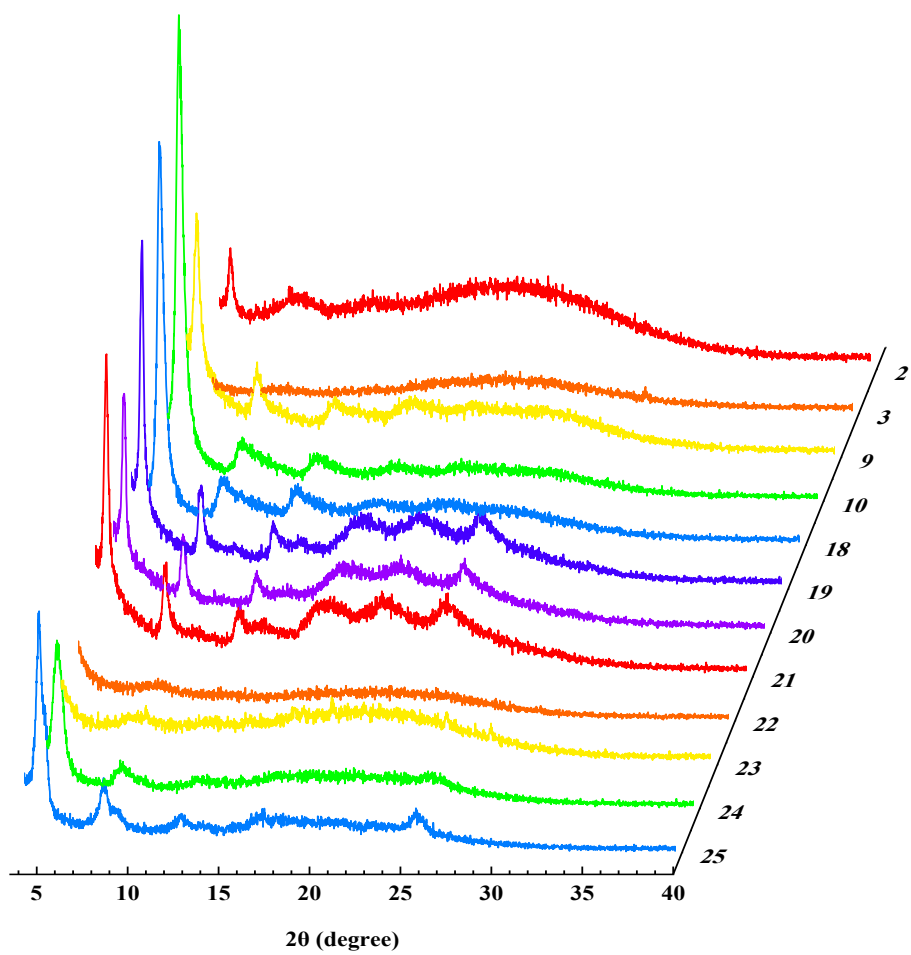

**Fig. S6** PXRD patterns of representative PTZ-TTA-COF samples in Table S1.

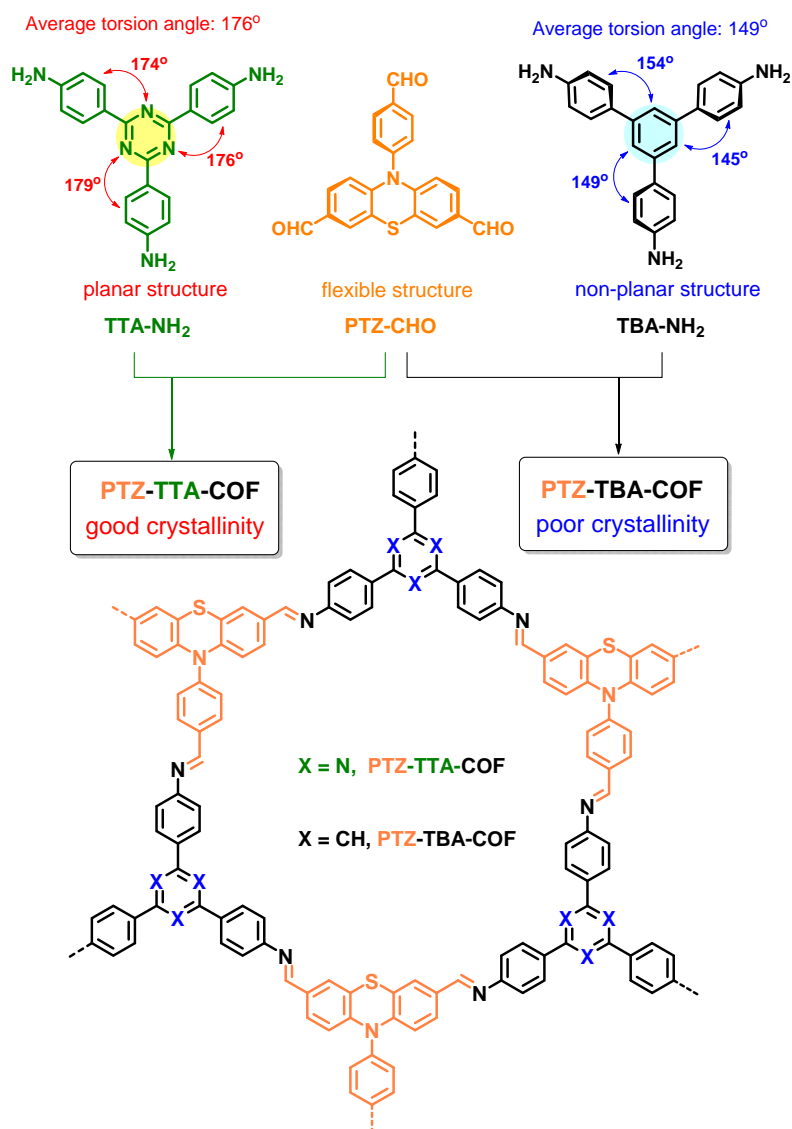

**Fig. S7** The torsion angle comparison of TTA-NH<sub>2</sub> and TBA-NH<sub>2</sub> amine building blocks as well as the chemical structures of corresponding COFs. The PTZ-TBA-COF was synthesized by the similar procedure as PTZ-TTA-COF.

The torsion angle data was taken from the literature report.<sup>S1</sup> It can be found that the three phenyl rings connected to the central triazine core in TTA-NH<sub>2</sub> are almost in the same plane, whereas for TBA-NH<sub>2</sub>, the central triphenyl cores are not in the same plane due to the steric interactions among the *ortho* hydrogens. As a consequence, the resulting PTZ-TTA-COF exhibited a much better crystallinity than that of PTZ-TBA-COF under the assistance of TTA-NH<sub>2</sub> with a

more planar structure, as evidenced by their PXRD patterns (**Fig. S8**). This result revealed that the planar structure of TTA-NH<sub>2</sub> played an important role in crystallizing flexible PTZ unit into a COF framework. Besides, the PTZ unit adopted a typical butterfly shaped configuration in COF lattice with a dihedral angle of 147°, which is quite different from the PTZ-CHO monomer (**Fig. S9** and **Fig. S10**). Such confirmation allows for the COF layer stacking, while the average interlayer distance is around 3.6 Å that is a little larger than the distance of 3.3-3.5 Å in common COFs, due to the butterfly configuration of PTZ subunit in PTZ-TTA-COF.

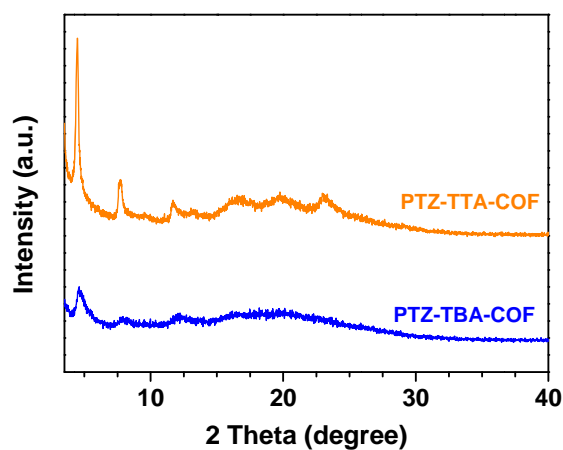

**Fig. S8** PXRD patterns of PTZ-TTA-COF and PTZ-TBA-COF. It is clear that PXRD peaks of the control PTZ-TBA-COF are weak and broad, suggesting its poor crystallinity due to the non-planar structure of TBA-NH<sub>2</sub>.

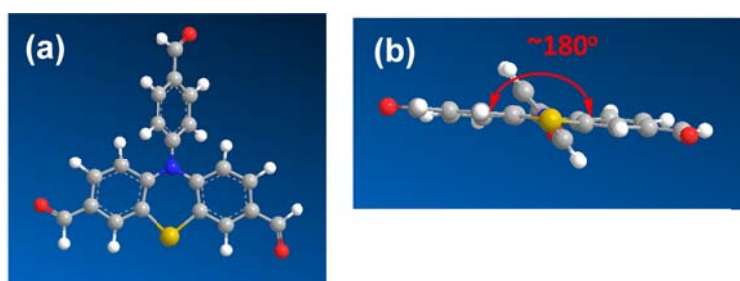

**Fig. S9** The optimized structure of PTZ-CHO monomer in top (a) and side (b) view, indicative of its non-planar structure.

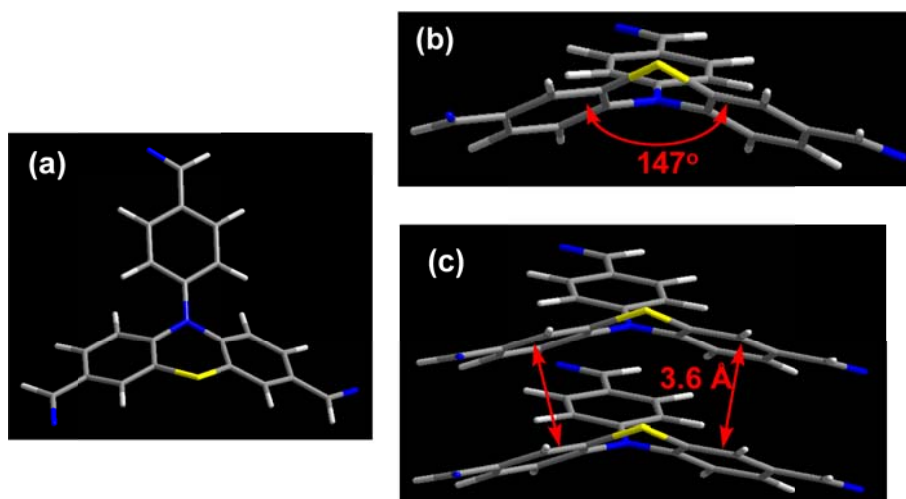

**Fig. S10** The optimized structure of PTZ part in COF framework from top (a), side (b) and packing (c) view, showing that the three phenyl rings are also not in the same plane. In contrast to PTZ-CHO monomer, the PTZ unit adopted a typical butterfly shaped configuration in PTZ-TTA-COF lattice, on account of its flexible and variable confirmation. The dihedral angle for two benzene rings in PTZ is about 147°. And the distance of the two layers is 3.6 Å that is a little larger than the distance of 3.3-3.5 Å in common COFs, due to the butterfly configuration of PTZ subunit in PTZ-TTA-COF.

## Synthesis of PTZ-TBA-COF

The PTZ-TBA-COF was synthesized by the similar procedure as PTZ-TTA-COF. Specifically, a mixture of TBA-NH<sub>2</sub> (21 mg, 0.06 mmol), PTZ-CHO (21 mg, 0.056 mmol), acetic acid (6 M, 0.1 mL) in *o*-dichlorobenzene (*o*-DCB)/diphenyl ether (DPE) (0.5 mL/0.5 mL) in a Pyrex tube (5 mL) was first sonicated for 30 minutes and then flash frozen at 77 K (liquid N<sub>2</sub> bath) and degassed by three times of freeze-pump-thaw cycle. The tube was sealed off under a flame and then heated at 120 °C for 72 h. After cooling to room temperature, the orange precipitate was washed several times until the upper layer is colorless with THF, MeOH, and acetone, respectively. The resulting powder was subjected to Soxhlet extraction with THF for 12 h, and then dried under vacuum at 60 °C overnight to obtain orange solid (76%).

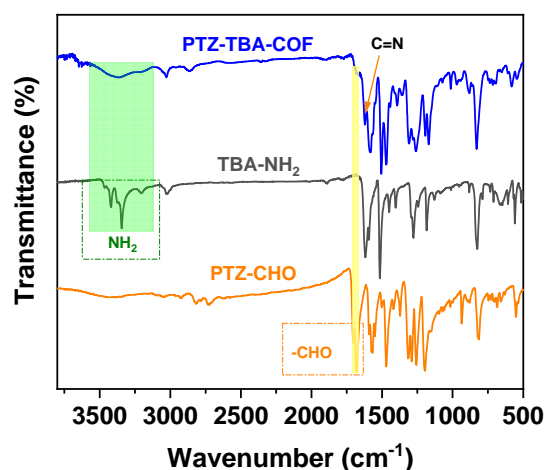

**Fig. S11** FT-IR spectra of PTZ-CHO, TBA-NH<sub>2</sub> and PTZ-TBA-COF. It can be observed that stretching bands of CHO and NH<sub>2</sub> in monomers are almost disappeared in COF sample, while a characteristic signal of C=N stretching peak at 1623 cm<sup>-1</sup> is detected in PTZ-TBA-COF sample. This FT-IR comparison confirmed the formation of imine-bridged framework structure with the high polycondensation degree of amine and aldehyde precursors in PTZ-TBA-COF.

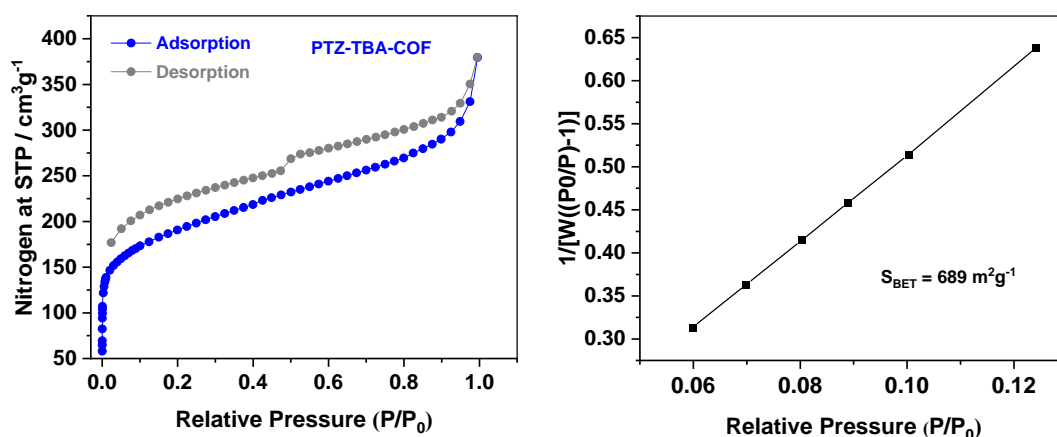

**Fig. S12** Nitrogen sorption isotherm at 77K (left) and BET specific surface area plot (right) for PTZ-TBA-COF, confirming its good porosity.

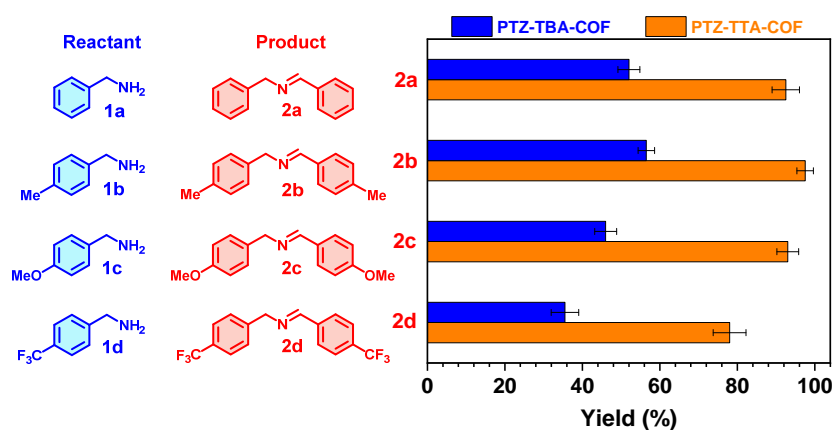

**Fig.S13** Comparison of PTZ-TTA-COF and PTZ-TBA-COF for photocatalyzing oxidative coupling of four benzylamines into imines at room temperature under air. Reaction conditions: amine (0.1 mmol), COF photocatalyst (2 mg), CD<sub>3</sub>CN (1 mL), blue LEDs ( $\lambda_{\max} = 450$  nm, 3 W x 4), 1 h. The yields were determined by <sup>1</sup>H NMR.

As for the two COFs, the donor parts are the same PTZ unit, while the TBA unit is a weaker acceptor in relative to TTA unit. As a result, the stronger D-A interaction is expected for PTZ-TTA-COF in comparison to PTZ-TBA-COF. Thus, PTZ-TTA-COF exhibited higher photocatalytic activities than PTZ-TBA-COF under the same reaction conditions

## Synthesis of TPA-TTA-COF

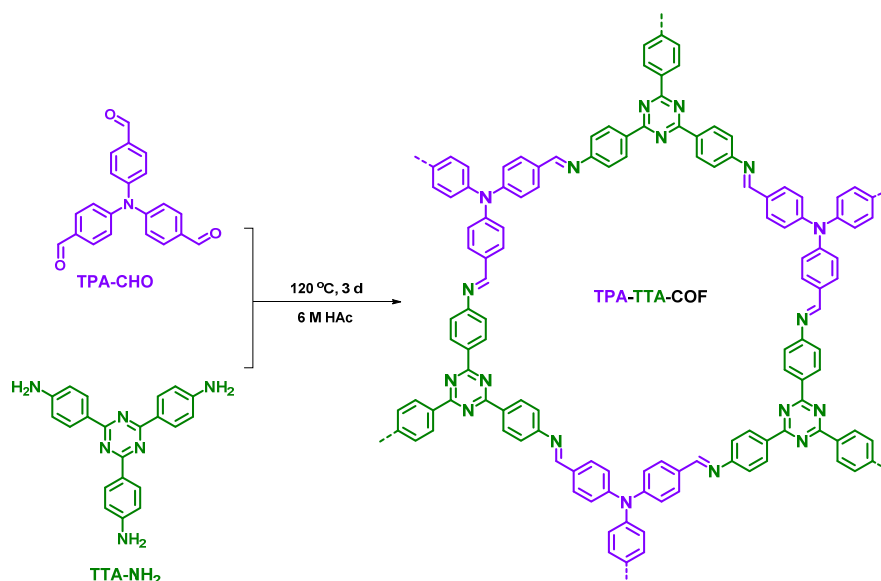

The control TPA-TTA-COF with the similar hexagonal reticular structure but small D-A contrast was prepared according to the previous reports and its PXRD pattern was consistent with the reported one.<sup>S2-S4</sup> A mixture of TTA-NH<sub>2</sub> (21 mg, 0.06 mmol), TPA-CHO (20 mg, 0.06 mmol), and acetic acid (6 M, 0.1 mL) in 1,4-dioxane/*o*-dichlorobenzene (*o*-DCB) (0.5 mL/0.5 mL) in a Pyrex tube (5 mL) was first sonicated for 30 minutes and then flash frozen at 77 K (liquid N<sub>2</sub> bath) and degassed by three times of freeze-pump-thaw cycles. The tube was sealed off under a flame and then heated at 120 °C for 72 h. After that cooling to room temperature, the yellow precipitate was washed several times with THF, MeOH, and acetone, respectively, and then dried under vacuum at 120 °C overnight to obtain a yellow solid (82%).

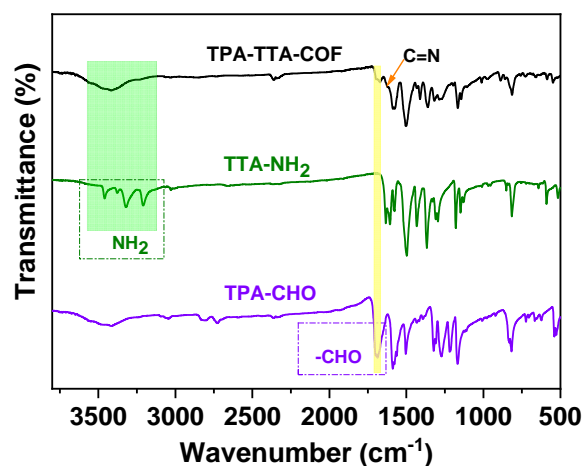

Fig. S14 FT-IR spectra of TPA-CHO, TTA-NH<sub>2</sub> and TPA-TTA-COF.



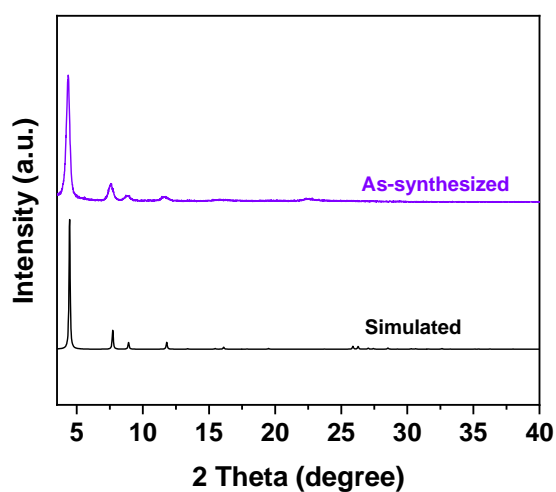

**Fig. S15** The comparison for simulated and as-synthesized PXRD patterns of TPA-TTA-COF, identifying its AA stacking mode and crystalline structure.

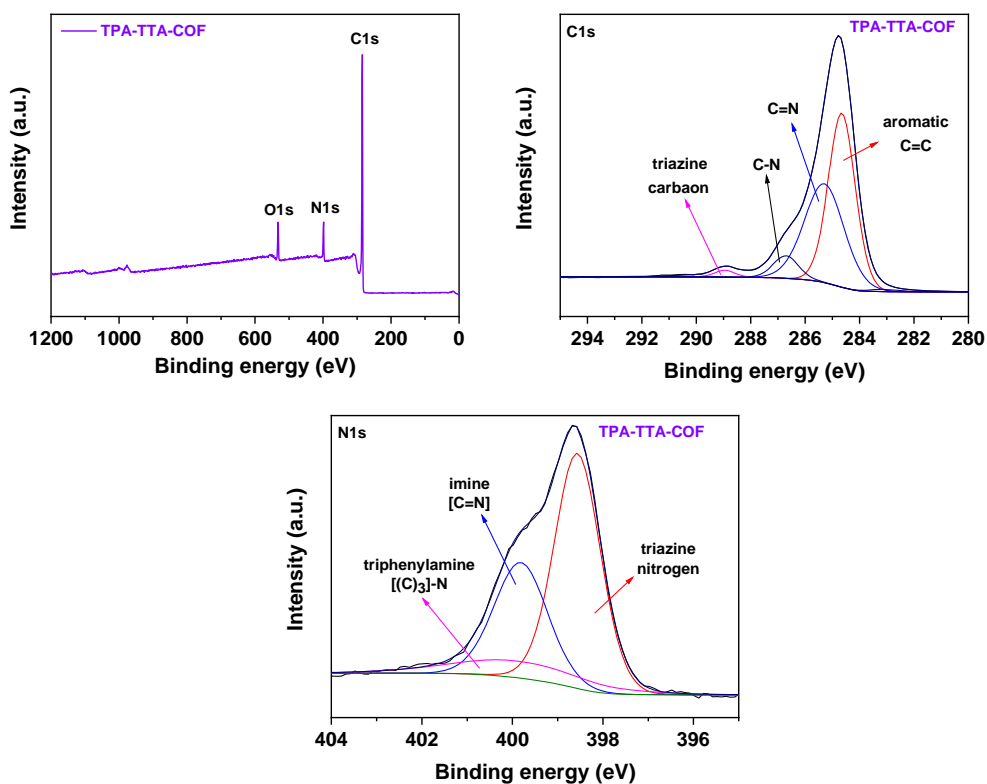

**Fig. S16** XPS spectra of TPA-TTA-COF. No metal species was detected in the XPS survey spectra.

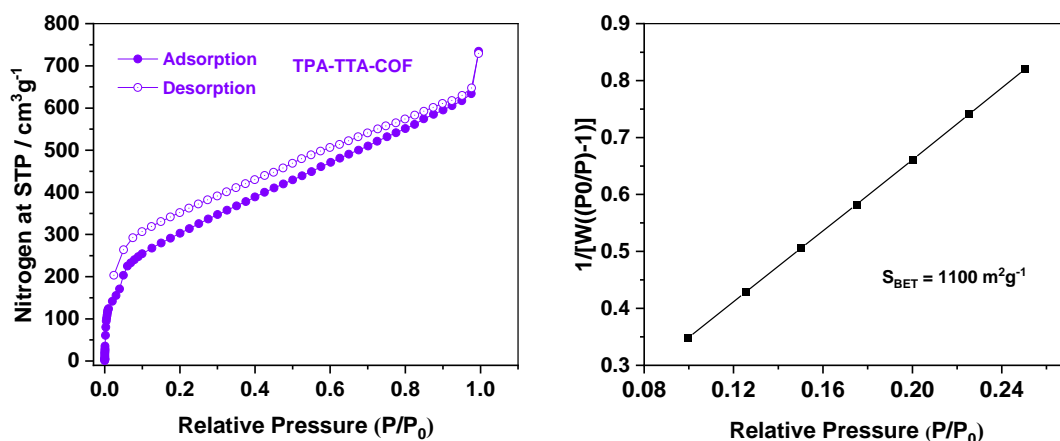

**Fig. S17** Nitrogen sorption isotherm at 77K (left) and BET specific surface area plot (right) for TPA-TTA-COF. The BET surface area of TPA-TTA-COF is higher than that of PTZ-TTA-COF, which should be ascribed to the better crystallinity of TPA-TTA-COF than PTZ-TTA-COF.

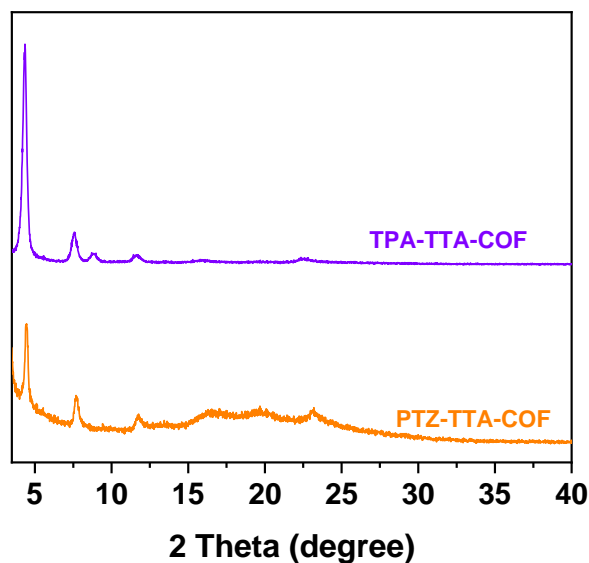

**Fig. S18** The PXRD comparison of PTZ-TTA-COF with TPA-TTA-COF in the same scale. It can be found that TPA-TTA-COF exhibited some better crystallinity than that of PTZ-TTA-COF. This phenomenon should be attributed to the flexible butterfly-shaped configuration of PTZ unit, thus, impeding the facile crystallization of PTZ-based COF to some extent.

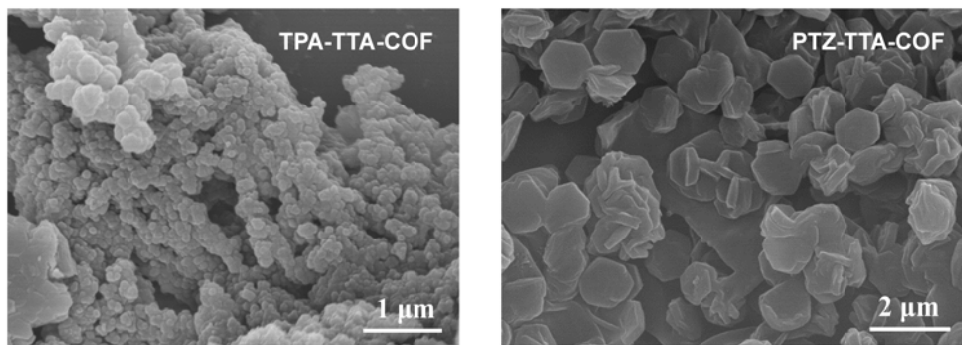

**Fig. S19** The SEM comparison of TPA-TTA-COF and PTZ-TTA-COF, showing the particle size of TPA-TTA-COF is much smaller than that of PTZ-TTA-COF.

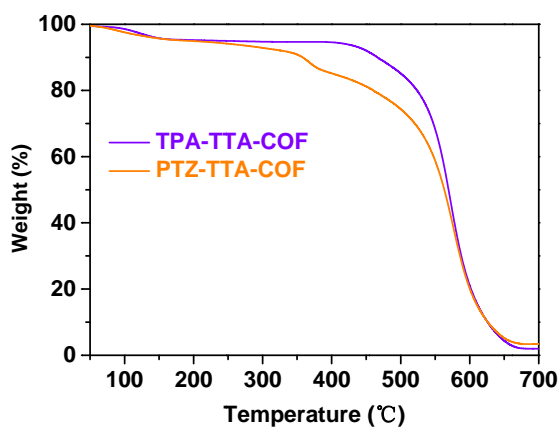

**Fig. S20** TGA of PTZ-TTA-COF and TPA-TTA-COF under  $N_2$  atmosphere with a heating rate of  $10\text{ }^\circ\text{C}/\text{min}$ . It can be found that TPA-TTA-COF exhibited a little better thermo-stability than that of PTZ-TTA-COF.

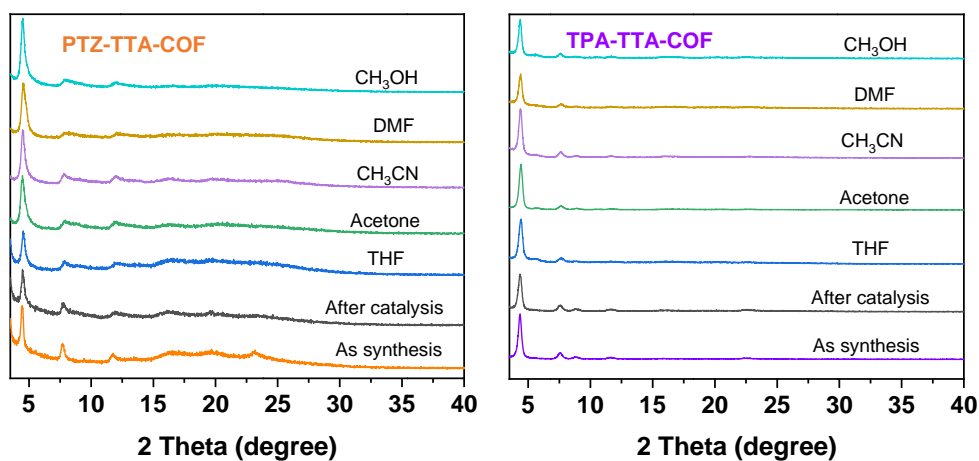

**Fig. S21** PXRD patterns of PTZ-TTA-COF and TPA-TTA-COF (as-synthesized, after photocatalysis, as well as soaked in various organic solvent for 12h), revealing their framework stabilities.

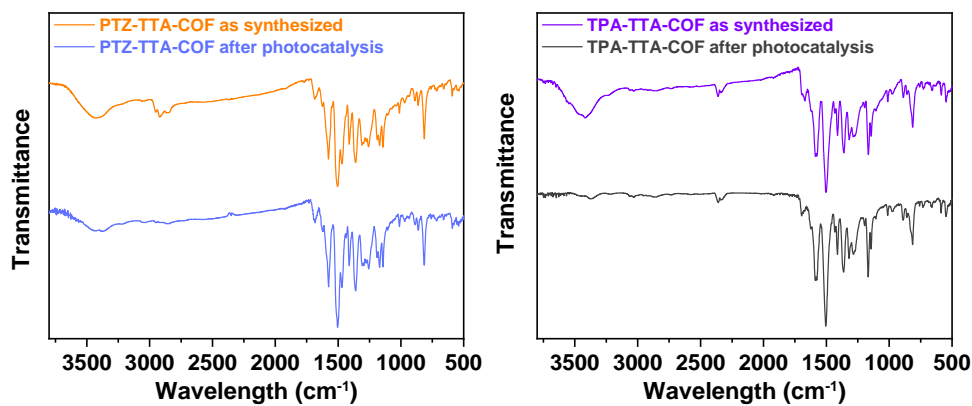

Fig. S22 FT-IR spectra of PTZ-TTA-COF and TPA-TTA-COF as-synthesized and after photocatalysis, indicating their chemical structural stability after photocatalysis.

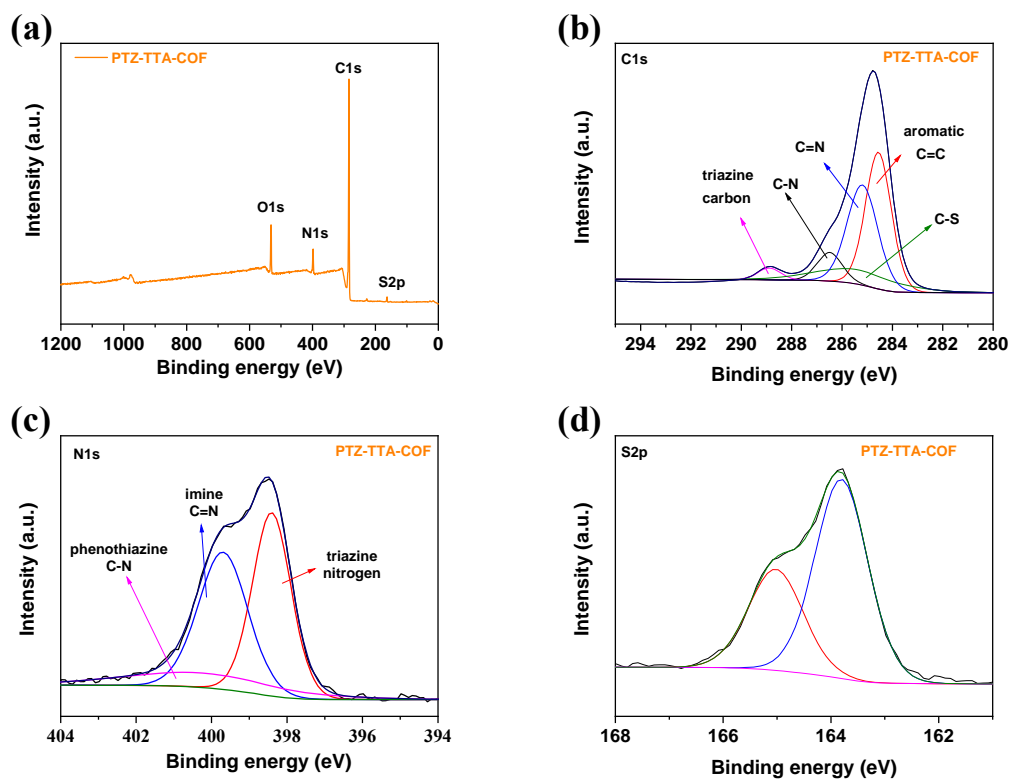

Fig. S23 XPS spectra of PTZ-TTA-COF. No metal species was detected in the XPS survey spectra.

**Table S2.** Atomistic coordinates for the refined unit cell parameters of PTZ-TTA-COF (AA stacking mode) optimized via Pawley refinement.

Molecular modeling of PTZ-TTA-COF was generated with the BIOVIA Materials Studio 7.0. Pawley refinement was carried out using Reflex, a software package for crystal determination from PXRD pattern. Unit cell dimension was set to the theoretical parameters. The Pawley refinement was performed to optimize the lattice parameters iteratively until the Rwp value converges and the overlay of the observed with refined profiles shows good agreement. The lattice models (e.g., cell parameters, atomic positions, and total energies) were then fully optimized using MS Forcite molecular dynamics module (universal force fields, Ewald summations) method.

---

Space-group P 1 - triclinic

$a = 23.4920 \text{ \AA}, b = 23.2820 \text{ \AA}, c = 3.6845 \text{ \AA}$

$\alpha = 92.2280^\circ, \beta = 103.0540^\circ, \gamma = 120.2430^\circ$

$V = 1667.81 \text{ \AA}^3 R_{wp} = 7.61\%, R_p = 5.91\%$

---

| Atom | x/a    | y/b    | z/c    | Atom | x/a     | y/b    | z/c    |
|------|--------|--------|--------|------|---------|--------|--------|
| N1   | 0.5824 | 0.6841 | 0.6357 | C39  | 0.0133  | 0.6143 | 0.6311 |
| C2   | 0.6119 | 0.6437 | 0.6202 | C40  | -0.0251 | 0.5454 | 0.6185 |
| C3   | 0.6838 | 0.6753 | 0.7074 | C41  | -0.0936 | 0.5146 | 0.6135 |
| C4   | 0.7142 | 0.6372 | 0.697  | C42  | -0.1246 | 0.5525 | 0.6219 |
| C5   | 0.6731 | 0.5669 | 0.6018 | C43  | -0.0861 | 0.6216 | 0.6353 |
| C6   | 0.6011 | 0.5352 | 0.5161 | C44  | -0.0176 | 0.6524 | 0.6402 |
| C7   | 0.5706 | 0.5733 | 0.524  | C45  | 0.7053  | 0.5267 | 0.5965 |
| C8   | 0.5685 | 1.1071 | 0.6859 | C46  | -0.1972 | 0.52   | 0.6126 |
| C9   | 0.525  | 1.0349 | 0.6642 | N47  | 0.7726  | 0.5566 | 0.6133 |
| C10  | 0.4535 | 0.9995 | 0.4628 | C48  | 0.6982  | 1.4226 | 0.584  |
| C11  | 0.4136 | 0.9307 | 0.4433 | N49  | 0.7655  | 1.453  | 0.6007 |
| C12  | 0.4436 | 0.8957 | 0.6254 | N50  | 0.6682  | 1.4596 | 0.5795 |
| C13  | 0.5161 | 0.9318 | 0.8221 | H51  | 0.7179  | 0.7324 | 0.7875 |
| C14  | 0.5559 | 1.0008 | 0.8414 | H52  | 0.7728  | 0.6632 | 0.7662 |

---

|     |        |        |        |     |         |        |        |
|-----|--------|--------|--------|-----|---------|--------|--------|
| N15 | 0.401  | 0.8243 | 0.607  | H53 | 0.567   | 0.478  | 0.4396 |
| C16 | 0.4311 | 0.7837 | 0.5824 | H54 | 0.5119  | 0.547  | 0.4519 |
| C17 | 0.5024 | 0.8093 | 0.7744 | H55 | 0.6275  | 1.1335 | 0.8149 |
| S18 | 0.562  | 0.8934 | 1.0602 | H56 | 0.4279  | 1.0268 | 0.3146 |
| C19 | 0.3898 | 0.7176 | 0.3621 | H57 | 0.3554  | 0.9016 | 0.2768 |
| C20 | 0.4175 | 0.6774 | 0.3399 | H58 | 0.6142  | 1.0292 | 1.0048 |
| C21 | 0.4877 | 0.7028 | 0.5353 | H59 | 0.3323  | 0.6957 | 0.1966 |
| C22 | 0.5299 | 0.7688 | 0.7514 | H60 | 0.3827  | 0.6238 | 0.1619 |
| C23 | 0.516  | 0.66   | 0.5083 | H61 | 0.5874  | 0.7894 | 0.9101 |
| C24 | 0.3299 | 0.7941 | 0.6124 | H62 | 0.4783  | 0.6043 | 0.3718 |
| C25 | 0.289  | 0.7252 | 0.6063 | H63 | 0.311   | 0.6916 | 0.5949 |
| C26 | 0.2214 | 0.6964 | 0.6139 | H64 | 0.1894  | 0.6404 | 0.606  |
| C27 | 0.1929 | 0.7362 | 0.631  | H65 | 0.21    | 0.8376 | 0.6589 |
| C28 | 0.2327 | 0.8047 | 0.6429 | H66 | 0.3316  | 0.8894 | 0.6481 |
| C29 | 0.3003 | 0.8331 | 0.6353 | H67 | 0.0996  | 0.7408 | 0.6446 |
| N30 | 0.0831 | 0.6442 | 0.6298 | H68 | 0.4892  | 1.2209 | 0.4125 |
| N31 | 0.5412 | 1.142  | 0.5605 | H69 | 0.5583  | 1.3453 | 0.4254 |
| C32 | 0.1219 | 0.7074 | 0.6356 | H70 | 0.7505  | 1.3412 | 0.726  |
| C33 | 0.5816 | 1.2122 | 0.5686 | H71 | 0.6819  | 1.2173 | 0.722  |
| C34 | 0.548  | 1.2478 | 0.4853 | H72 | -0.0005 | 0.514  | 0.6121 |
| C35 | 0.586  | 1.3164 | 0.4907 | H73 | -0.1247 | 0.4584 | 0.6026 |
| C36 | 0.6582 | 1.3502 | 0.576  | H74 | -0.1106 | 0.653  | 0.6422 |
| C37 | 0.6919 | 1.3144 | 0.6572 | H75 | 0.0133  | 0.7086 | 0.6516 |
| C38 | 0.654  | 1.2459 | 0.6544 |     |         |        |        |

---

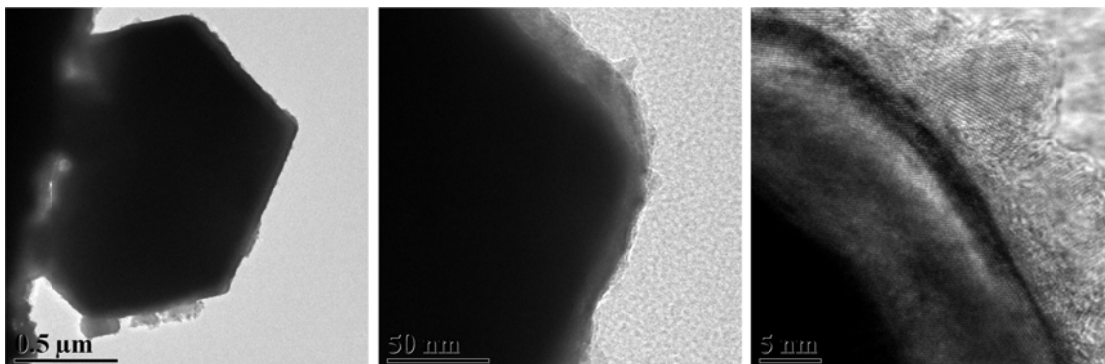

**Fig. S24** TEM images of PTZ-TTA-COF with increasing amplification.

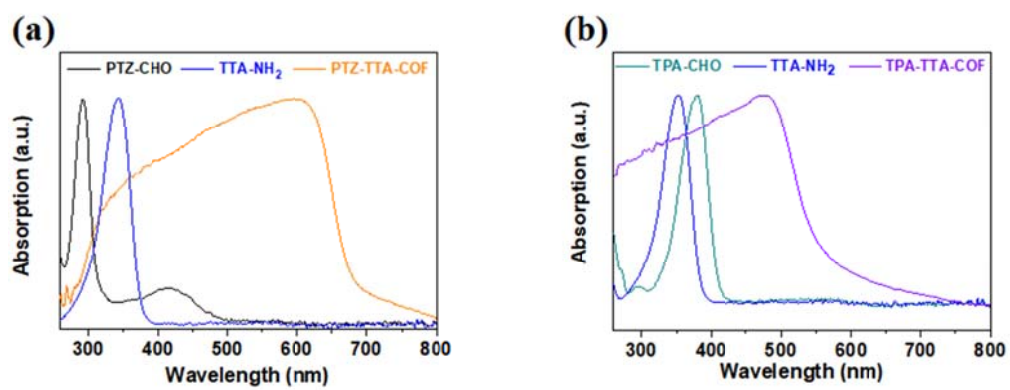

**Fig. S25** UV-Vis spectra of (a) PTZ-TTA-COF, (b) TPA-TTA-COF, and their corresponding monomers.

### **Computational Methods:**

All the density functional theory (DFT) calculations are carried out in the Vienna *Ab-initio* Simulation Package (VASP),<sup>S5</sup> and VASPKIT<sup>S6</sup> is used to post-process the data calculated by VASP. The generalized gradient approximation (GGA) is used with Perdew-Burke-Ernzerhof (PBE)<sup>S7,S8</sup> exchange-correlation functional. The Projector augmented-wave (PAW) method is used to deal with the core electrons, and the valence electrons are described by a plane wave basis set with a cutoff energy of 450 eV. The adsorption energy and electronic properties are calculated by k-point grid (7×1×1). The convergence criteria of force and energy are set to 0.03eV·Å<sup>-1</sup> and 10<sup>-5</sup>eV, respectively. In order to obtain a better description of band gap, HSE06 hybrid functional<sup>S9</sup> was used to calculate band structure. The path connected high-symmetry points in Brillouin zone were selected as  $\Gamma$ , M, K and  $\Gamma$  points and 60 K-points were sampled between each high-symmetry points. Density of states was also evaluated at HSE06 level with a denser Brillouin sampling of 12×12×1.



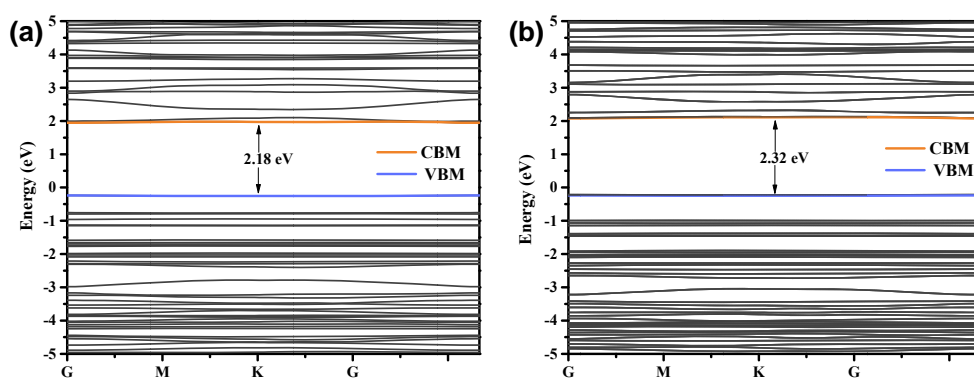

**Fig. S26** Calculated electronic band structures of PTZ-TTA-COF (a) and TPA-TTA-COF (b) by the screened hybrid functional method HSE06.

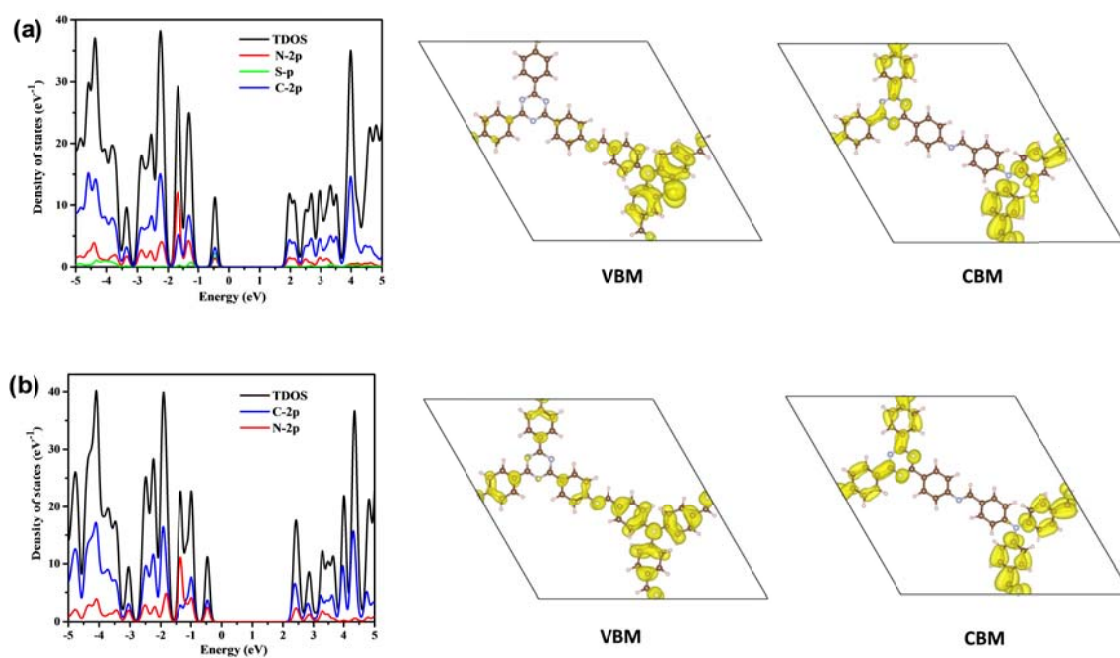

**Fig. S27** The calculated total and partial densities of states (DOS) projected on atomic orbitals as well as spatial charge distributions of VBM and CBM for PTZ-TTA-COF (a) and TPA-TTA-COF (b).

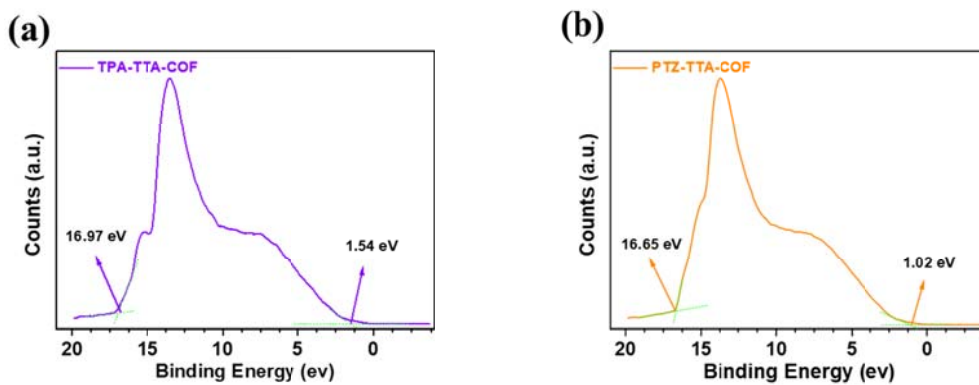

**Fig. S28** High-resolution valence band ultraviolet photoelectron spectra (UPS) of TPA-TTA-COF (a) and PTZ-TTA-COF (b).

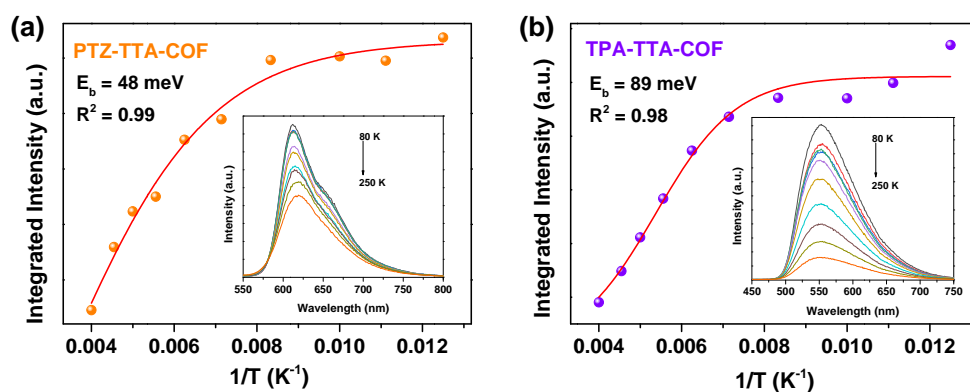

**Fig. S29** Integrated PL intensity of PTZ-TTA-COF (a) and TPA-TTA-COF (b) as a function of temperature (inset: their corresponding temperature-dependent PL spectra from 80 to 250 K).

Arrhenius equation for fitting PL data:

$$I(T) = \frac{I_0}{1 + Ae^{-E_b/k_B T}}$$

$I_0$  is the intensity at 0 K,  $A$  is a proportional constant and  $k_B$  is the Boltzmann constant,  $E_b$  is the exciton binding energy.

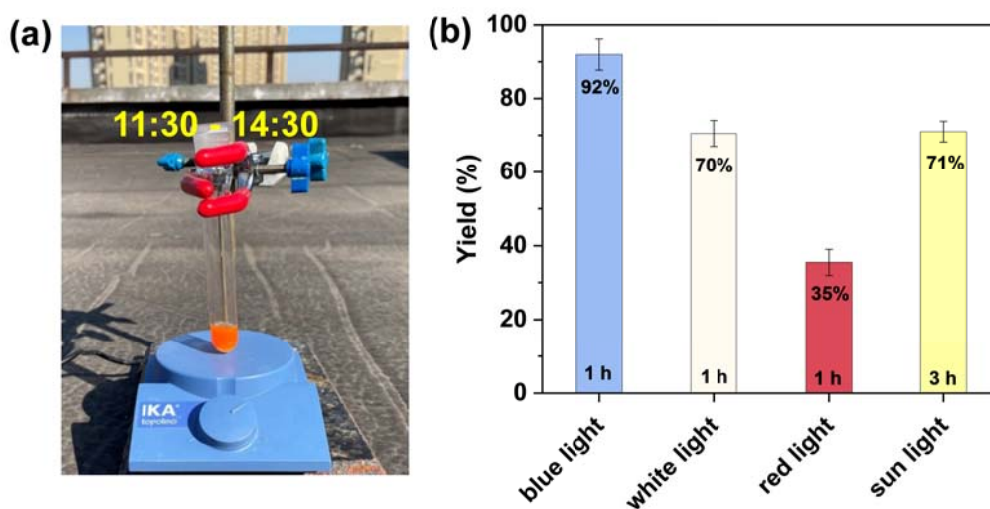

**Fig. S30** (a) The simple setup for natural sunlight driven the photocatalytic model reaction of benzylamine to its imine by PTZ-TTA-COF for 3 h; (b) Yields of the photocatalytic model reaction of benzylamine to its imine by PTZ-TTA-COF under different light sources. Reaction conditions: benzylamine (0.1 mmol), PTZ-TTA-COF (2 mg), solvent acetonitrile ( $\text{CD}_3\text{CN}$ , 1 mL), 1 h, in the open air at room temperature. The yields were determined by  $^1\text{H}$  NMR.

The model reaction of PTZ-TTA-COF photocatalyzed oxidative coupling of benzylamine to its imine was further performed by using different light sources, including natural sunlight, white LEDs, and red LEDs. The corresponding yields were summarized in **Fig. S30**. Due to the broad light absorption range of PTZ-TTA-COF, this photocatalytic model reaction can occur with various yields under the different light irradiation. Besides, it can be found that blue LEDs gave the best yield of 92% because of the highest energy of blue light, while the lowest yield of 35% was obtained under red LEDs due to the lowest energy of red light. On the other hand, this reaction also can go well under the natural sunlight (71%, for 3 h at noon in October. *However, the activity is not high, which may be ascribed to the weak sunlight in autumn.*).

**Table S3.** The comparison of photocatalytic oxidative cyclization of five thioamides to 1,2,4-thiadiazoles by PTZ-TTA-COF and TPA-TTA-COF.<sup>a</sup>

| Entry | Substrate | Product | Time (h) | Yield <sup>b</sup> (%) |
|-------|-----------|---------|----------|------------------------|
| 1     |           |         | 2        | 72 <sup>c</sup>        |
|       |           |         |          | 33 <sup>d</sup>        |
| 2     |           |         | 2        | 61 <sup>c</sup>        |
|       |           |         |          | 37 <sup>d</sup>        |
| 3     |           |         | 2        | 72 <sup>c</sup>        |
|       |           |         |          | 34 <sup>d</sup>        |
| 4     |           |         | 2        | 60 <sup>c</sup>        |
|       |           |         |          | 25 <sup>d</sup>        |
| 5     |           |         | 2        | 67 <sup>c</sup>        |
|       |           |         |          | 26 <sup>d</sup>        |

<sup>a</sup>Reaction conditions: thioamide (0.05 mmol), COF (2 mg), CH<sub>3</sub>CN (1 mL), irradiation with blue LEDs ( $\lambda_{\text{max}} = 450 \text{ nm}$ , 3 W  $\times$  4), 2 h. <sup>b</sup>determined by <sup>1</sup>H NMR analysis. <sup>c</sup>by PTZ-TTA-COF. <sup>d</sup>by TPA-TTA-COF.

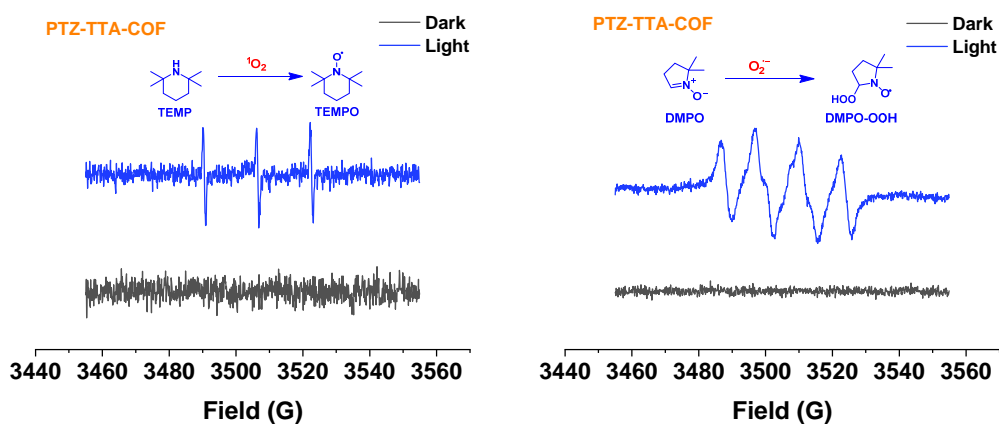

**Fig. S31** EPR spectra of a mixture of PTZ-TTA-COF with TEMP upon light irradiation and in the dark (left) as well as DMPO upon light irradiation and in the dark (right).

## Determination for the generation of ammonia in photocatalytic oxidative coupling reaction of amines:

Benzylamine (0.1 mmol) and PTZ-TTA-COF (2 mg) was mixed in acetonitrile (1 mL), which was stirred and irradiated by blue LEDs for 1 h at room temperature in air. Then, COF sample was separated from the reaction mixture by high speed centrifugation. After that, 2 mL DI water was added into the above solution, which subsequently was extracted by 5 mL dichloromethane for twice. The aqueous layer was subject to pH test, showing its basic solution (pH = 8-9, **Fig. S32a**). In order to rule out other possible factor caused pH change, two control experiments were further performed as the same above procedure but without benzylamine or light irradiation, respectively. It can be found that both of the two aqueous layers were neutral with pH = 6-7 (**Fig. S32b** and **S32c**). Based on these experimental results, the pH change of (a) solution should be derived from ammonia. Thus, we can conclude that ammonia was produced in the photocatalytic oxidative coupling reaction of amines.

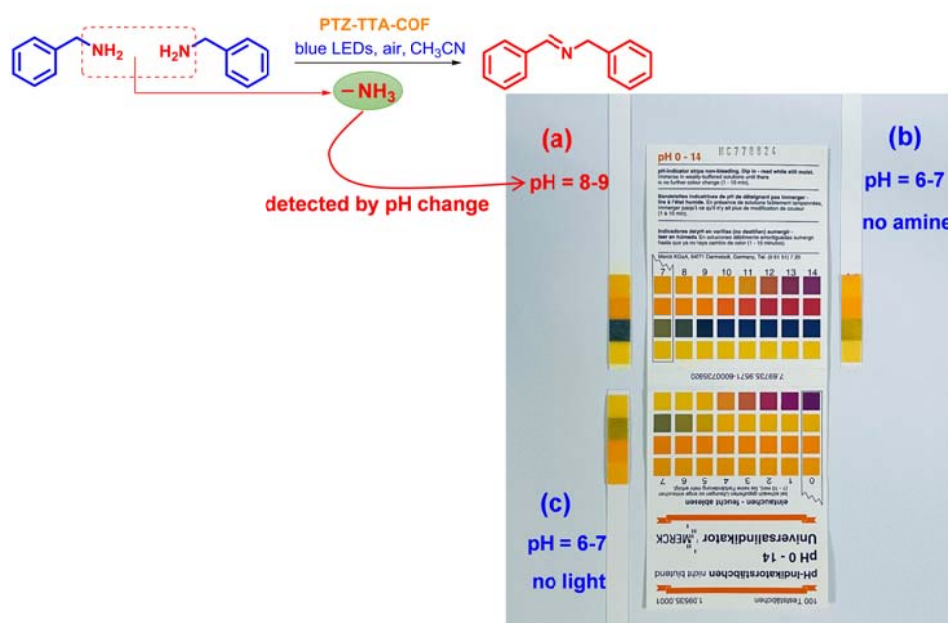

**Fig.S32** The pH test after the photocatalytic oxidative coupling of benzylamine to its imine (a), and two control experimental results (b and c).

## Determining the limiting step in photocatalytic oxidative coupling reaction of amines:

**Table S4** PTZ-TTA-COF photocatalyzed oxidative coupling of benzylamine to its imine under various conditions.<sup>a</sup>

| Entry | PTZ-TTA-COF | Benzylamine     | Time   | Atmosphere     | Product Yield |
|-------|-------------|-----------------|--------|----------------|---------------|
| 1     | 1 mg        | 0.1 mmol        | 30 min | air            | 52            |
| 2     | <b>2 mg</b> | <b>0.1 mmol</b> | 30 min | <b>air</b>     | <b>72</b>     |
| 3     | 3 mg        | 0.1 mmol        | 30 min | air            | 71            |
| 4     | 2 mg        | 0.1 mmol        | 30 min | O <sub>2</sub> | 97            |
| 5     | 2 mg        | 0.2 mmol        | 30 min | air            | 44            |
| 6     | 2 mg        | 0.3 mmol        | 30 min | air            | 29            |

<sup>a</sup>Reaction conditions: CD<sub>3</sub>CN (1 mL), blue LEDs ( $\lambda_{\max}$  = 450 nm, 3 W x 4), at room temperature. The yields were determined by <sup>1</sup>H NMR.

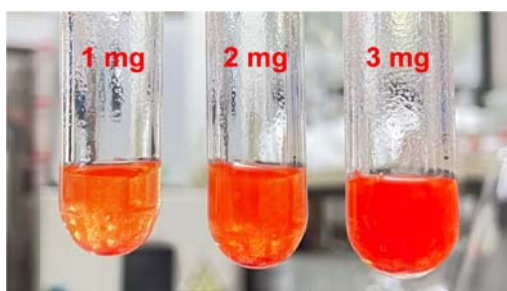

**Fig. S33** Different weight of PTZ-TTA-COF samples were dispersed into 1 mL acetonitrile.

First, a different amount of PTZ-TTA-COF was used to photocatalyze the reaction for 30 min (Entry 1-3, **Table S4**). The highest yield was obtained when using 2 mg COF sample. In contrast, a relatively decreased yield was observed for the case of 3 mg COF sample (*when considering the higher weight of 3 mg COF photocatalyst than 2 mg*), which should be ascribed to its too high concentration. From the comparison of different COF concentration in **Fig. S33**, it can be found that light is difficult to penetrate the mixture solution (3 mg/mL). As a result, the COF

photocatalyst in the inner solution cannot be efficiently excited. Additionally, too high concentration of photocatalyst often results in the self-quenching of exciton, thus, decreasing its photocatalytic activity. Based on these results, the suitable concentration of COF was determined to be 2 mg/mL in acetonitrile.

Second, when the reaction was conducted in pure O<sub>2</sub> atmosphere (Entry 4, **Table S4**), the rate is obviously accelerated in comparison to air atmosphere, whereas only trace product was detected in N<sub>2</sub> atmosphere. This result indicated that oxygen played a critical role in this photocatalytic process. Besides, we also employed quenching experiments and EPR measurements to identify the reactive oxygen species (ROS) of <sup>1</sup>O<sub>2</sub> and O<sub>2</sub><sup>•-</sup>, which were generated by the electron and energy transfer process from excited COF photocatalyst to O<sub>2</sub> molecules.

Third, we further investigated the reaction under the different concentration of benzylamine. It was found that when the substrate concentration was increased from 0.1 mmol to 0.2 and 0.3 mmol (Entry 5 and 6, **Table S4**), the product yield was decreased to be 44% and 29%, respectively. This result demonstrated that the conversion of benzylamine was determined by the generation rate of ROS in the mixture solution.

Based on these above results and the proposed mechanism, it is reasonable to speculate that the limiting step in this photocatalytic reaction should be the ROS generation produced by the electron and energy transfer process from photo excited PTZ-TTA-COF to O<sub>2</sub> molecules.

**Table S5.** Photocatalytic oxidative coupling of various amines by **PTZ-TTA-COF**<sup>a</sup>

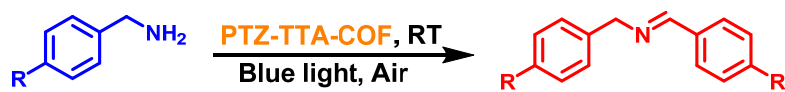

| Entry | Substrate | Product | Time (h) | Yield <sup>b</sup> (%) |
|-------|-----------|---------|----------|------------------------|
| 1     |           |         | 1        | 92                     |
| 2     |           |         | 1        | 96                     |
| 3     |           |         | 1        | 99                     |
| 4     |           |         | 1        | 96                     |
| 5     |           |         | 2        | 97                     |
| 6     |           |         | 1        | 91                     |
| 7     |           |         | 1        | 95                     |
| 8     |           |         | 1        | 95                     |
| 9     |           |         | 1        | 75                     |
| 10    |           |         | 1        | 84                     |
| 11    |           |         | 2        | 91                     |



|    |                                                                                   |                                                                                   |   |    |
|----|-----------------------------------------------------------------------------------|-----------------------------------------------------------------------------------|---|----|
| 12 | 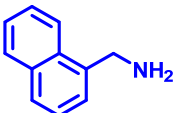 |  | 2 | 99 |
| 13 |  |  | 2 | 99 |
| 14 |  |  | 2 | 85 |

<sup>a</sup>Reaction conditions: benzylamines (0.1 mmol), PTZ-TTA-COF (2 mg), CD<sub>3</sub>CN (1 mL), irradiation with blue LEDs ( $\lambda_{\text{max}} = 450 \text{ nm}$ , 3 W  $\times$  4), 1 h. <sup>b</sup>Determined by <sup>1</sup>H NMR analysis.

---

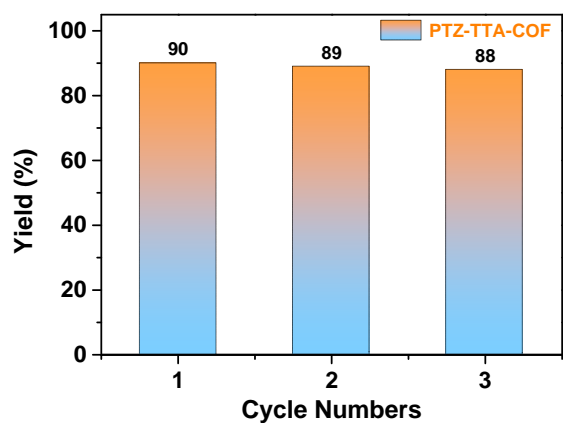

**Fig. S34** Recycling of PTZ-TTA-COF for the photocatalyzed aerobic oxidative coupling of benzylamine to imine.

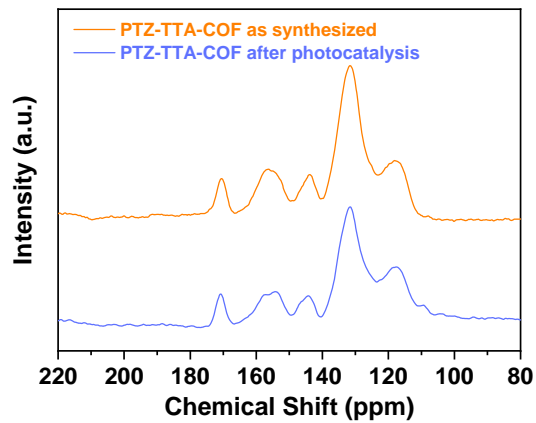

**Fig. S35** Solid-state  $^{13}\text{C}$  NMR of PTZ-TTA-COF as-synthesized (orange) and after photocatalysis (blue).

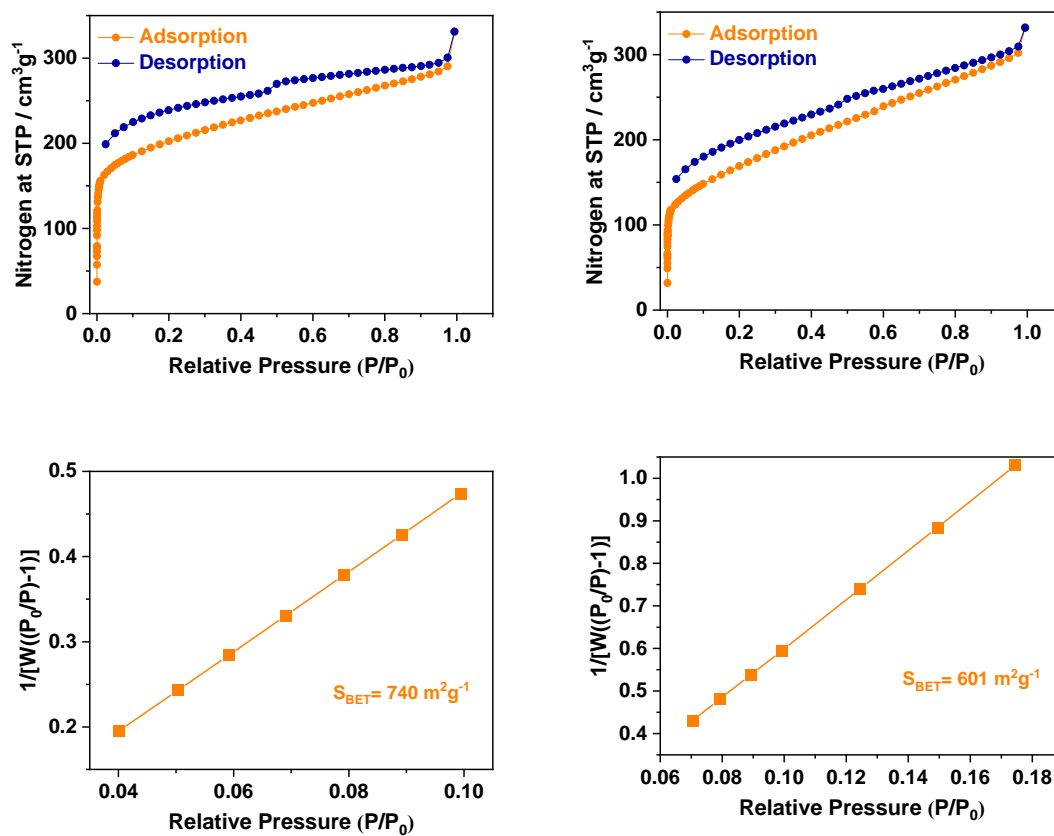

**Fig. S36** Nitrogen sorption isotherms for PTZ-TTA-COF as-synthesized (left) and after photocatalysis (right).

## References

- S1. A. Halder, S. Kandambeth, B. P. Biswal, G. Kaur, N. C. Roy, M. Addicoat, J. K. Salunke, S. Banerjee, K. Vanka, T. Heine, S. Verma and R. Banerjee, *Angew. Chem. Int. Ed.*, 2016, **55**, 7806-7810.
- S2. R. Luo, H. Lv, Q. Liao, N. Wang, J. Yang, Y. Li, K. Xi, X. Wu, H. Ju and J. Lei, *Nat. Commun.*, 2021, **12**, 6808.
- S3. J. Yang, A. Acharjya, M.-Y. Ye, J. Rabeah, S. Li, Z. Kochovski, S. Youk, J. Roeser, J. Grüneberg, C. Penschke, M. Schwarze, T. Wang, Y. Lu, R. van de Krol, M. Oschatz, R. Schomäcker, P. Saalfrank and A. Thomas, *Angew. Chem. Int. Ed.*, 2021, **60**, 19797-19803.
- S4. S. Wang, Y. Yang, H. Zhang, Z. Zhang, C. Zhang, X. Huang, D. Kozawa, P. Liu, B.-G. Li and W.-J. Wang, *J. Am. Chem. Soc.*, 2021, **143**, 5003-5010.
- S5. G. Kresse and J. Furthmüller, *Phys. Rev. B*, 1996, **54**, 11169-11186.
- S6. V. Wang, N. Xu, J.-C. Liu, G. Tang and W.-T. Geng, *Comput. Phys. Commun.*, 2021, **267**, 108033.
- S7. J. P. Perdew, K. Burke and M. Ernzerhof, *Phys. Rev. Lett.*, 1996, **77**, 3865-3868.
- S8. J. P. Perdew, K. Burke and M. Ernzerhof, *Phys. Rev. Lett.*, 1997, **78**, 1396-1396.
- S9. A. V. Krukau, O. A. Vydrov, A. F. Izmaylov and G. E. Scuseria, *J. Chem. Phys.*, 2006, **125**, 224106.
